# Supplementary material
Source: PubMed Central journal article supplement (PMC6419294)
Supplement: CJN.05240418SupplementaryData.pdf [file CJN.05240418SupplementaryData.pdf]

## Removal of protein-bound uremic toxins during hemodialysis using a binding competitor

Magdalena Madero, MD<sup>1</sup>, Karla B. Cano, MD<sup>1</sup>, Israel Campos, MD<sup>2</sup>, Xia Tao, PhD<sup>2</sup>,  
Vaibhav Maheshwari, PhD<sup>2</sup>, Jillian Brown, BS<sup>3</sup>, Beatriz Cornejo, MD<sup>1</sup>, Garry Handelman, PhD<sup>3</sup>,  
Stephan Thijssen, MD<sup>2</sup>, Peter Kotanko, MD<sup>2,4</sup>

<sup>1</sup> Instituto Nacional de Cardiología Ignacio Chávez, Ciudad de México, México

<sup>2</sup> Renal Research Institute, New York, NY, USA

<sup>3</sup> University of Massachusetts, Lowell, MA, USA

<sup>4</sup> Icahn School of Medicine at Mount Sinai, New York, NY, USA

## Supplemental material

### Table of Contents

|                                                                           |    |
|---------------------------------------------------------------------------|----|
| Figure 1. Indoxyl sulfate arterial serum concentration over time .....    | 3  |
| Figure 2. p-Cresyl sulfate arterial serum concentration over time.....    | 4  |
| Figure 3. Tryptophan arterial serum concentration over time.....          | 5  |
| Figure 4. Urea arterial serum concentration over time.....                | 6  |
| Figure 5. Creatinine arterial serum concentration over time.....          | 7  |
| Figure 6. Ibuprofen arterial serum concentration over time.....           | 8  |
| Figure 7. Indoxyl sulfate venous serum concentration over time .....      | 9  |
| Figure 8. p-Cresyl sulfate venous serum concentration over time .....     | 10 |
| Figure 9. Tryptophan venous serum concentration over time .....           | 11 |
| Figure 10. Urea venous serum concentration over time .....                | 12 |
| Figure 11. Creatinine venous serum concentration over time .....          | 13 |
| Figure 12. Ibuprofen venous serum concentration over time.....            | 14 |
| Figure 13. Indoxyl sulfate dialysate outlet concentration over time.....  | 15 |
| Figure 14. p-Cresyl sulfate dialysate outlet concentration over time..... | 16 |
| Figure 15. Tryptophan dialysate outlet concentration over time.....       | 17 |
| Figure 16. Urea dialysate outlet concentration over time .....            | 18 |

Supplemental material is neither peer-reviewed nor thoroughly edited by CJASN. The authors alone are responsible for the accuracy and presentation of the material.

Figure 17. Creatinine dialysate outlet concentration over time..... 19  
Figure 18. Ibuprofen dialysate outlet concentration over time ..... 20

Figure 1. Indoxyl sulfate arterial serum concentration over time

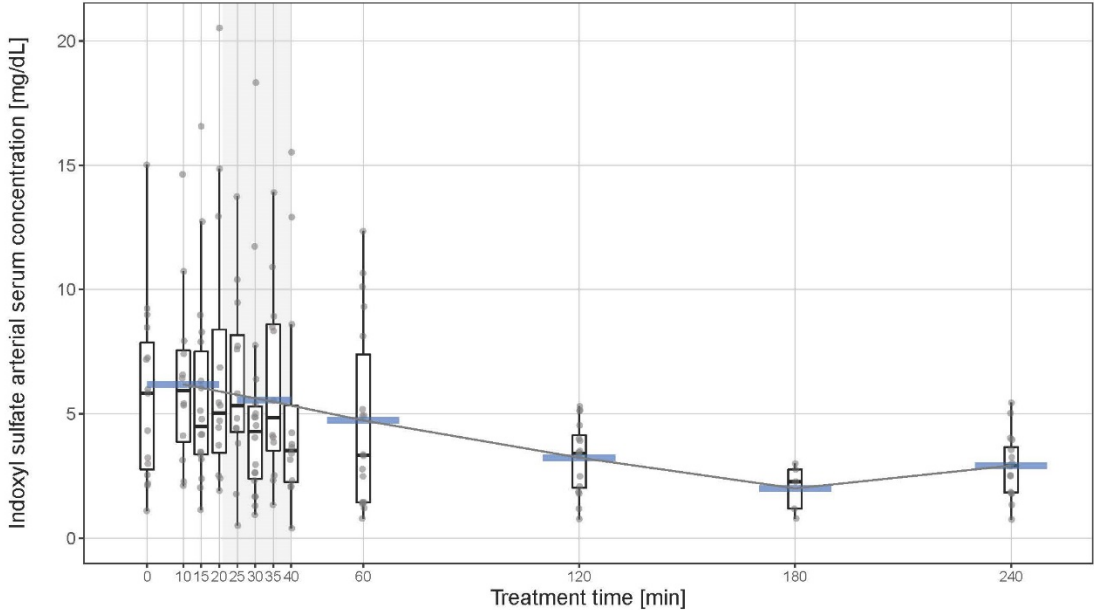

The shaded area between minute 21 and minute 40 indicates the ibuprofen infusion period. Blue bars represent the median over the corresponding period or time point.

Figure 2. p-Cresyl sulfate arterial serum concentration over time

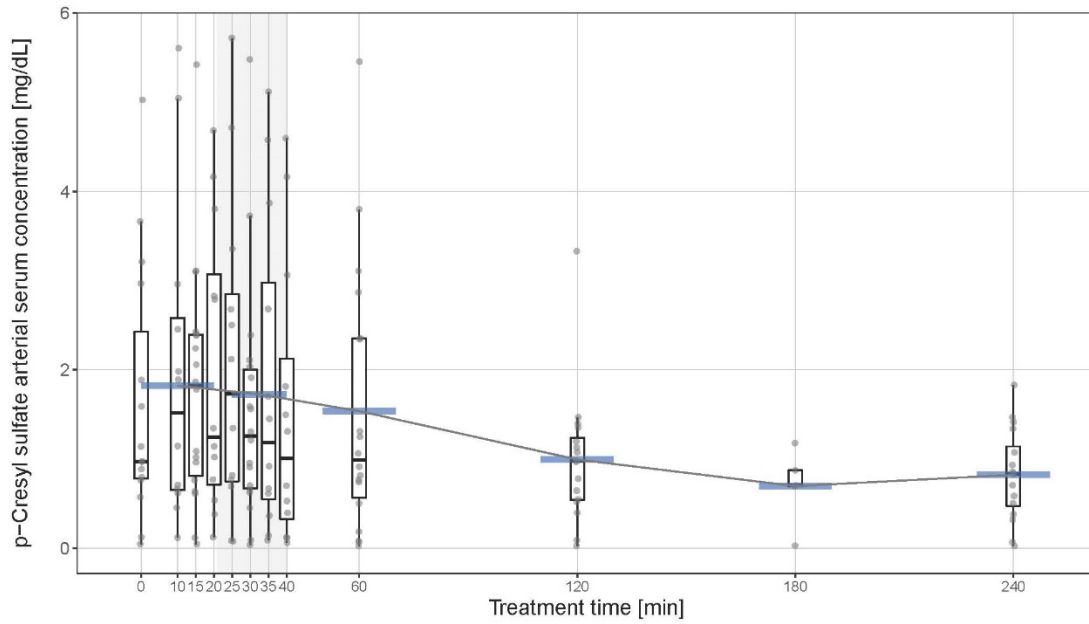

The shaded area between minute 21 and minute 40 indicates the ibuprofen infusion period. Blue bars represent the median over the corresponding period or time point.

Supplemental material is neither peer-reviewed nor thoroughly edited by CJASN. The authors alone are responsible for the accuracy and presentation of the material.

Figure 3. Tryptophan arterial serum concentration over time

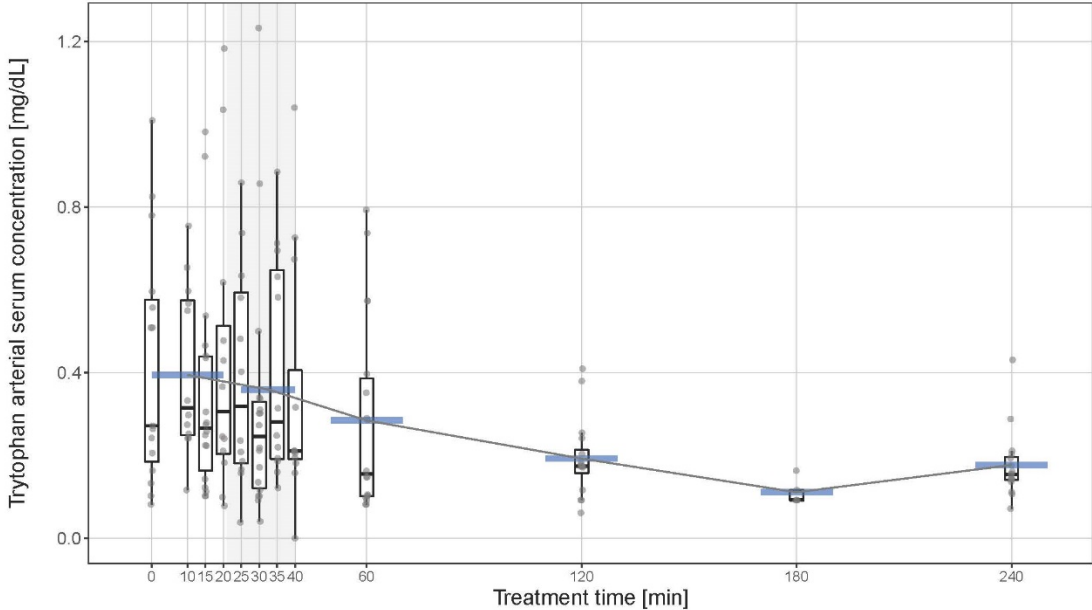

The shaded area between minute 21 and minute 40 indicates the ibuprofen infusion period. Blue bars represent the median over the corresponding period or time point.

Figure 4. Urea arterial serum concentration over time

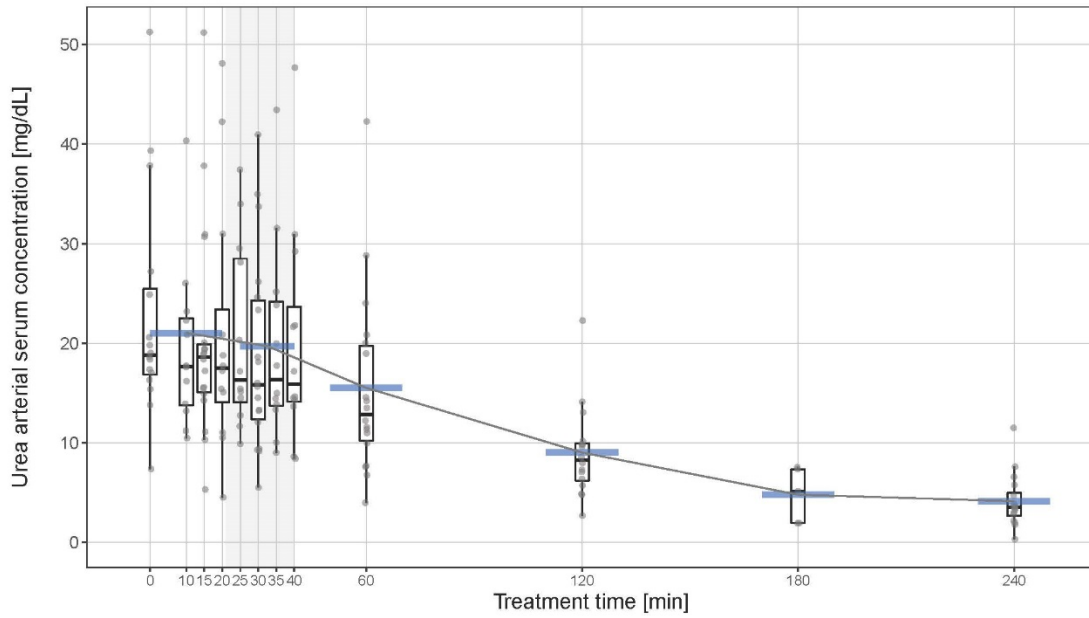

The shaded area between minute 21 and minute 40 indicates the ibuprofen infusion period. Blue bars represent the median over the corresponding period or time point.

Supplemental material is neither peer-reviewed nor thoroughly edited by CJASN. The authors alone are responsible for the accuracy and presentation of the material.

Figure 5. Creatinine arterial serum concentration over time

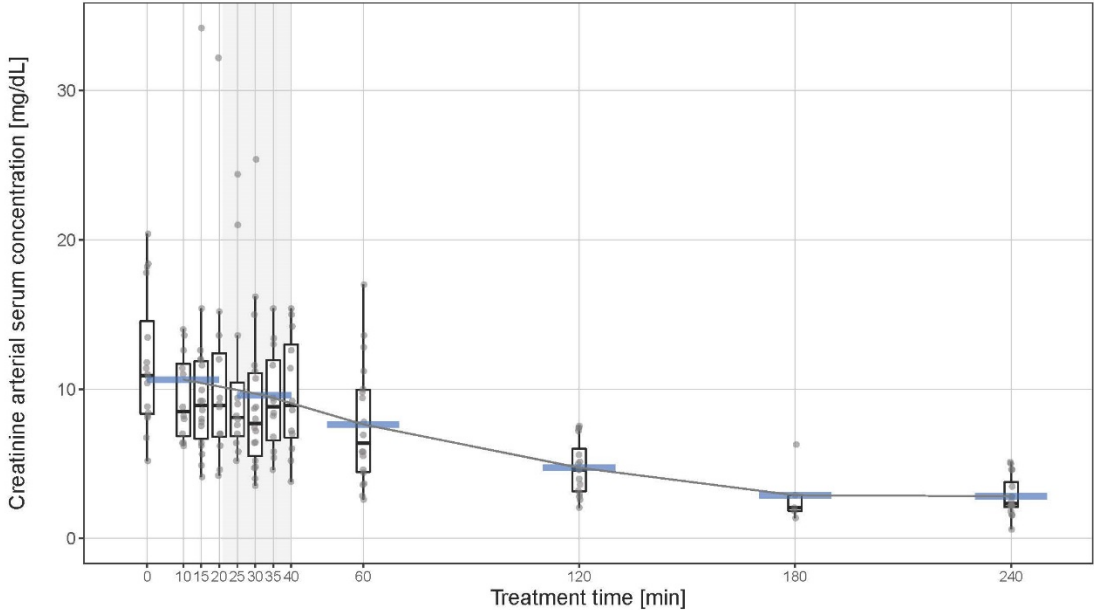

The shaded area between minute 21 and minute 40 indicates the ibuprofen infusion period. Blue bars represent the median over the corresponding period or time point.

Figure 6. Ibuprofen arterial serum concentration over time

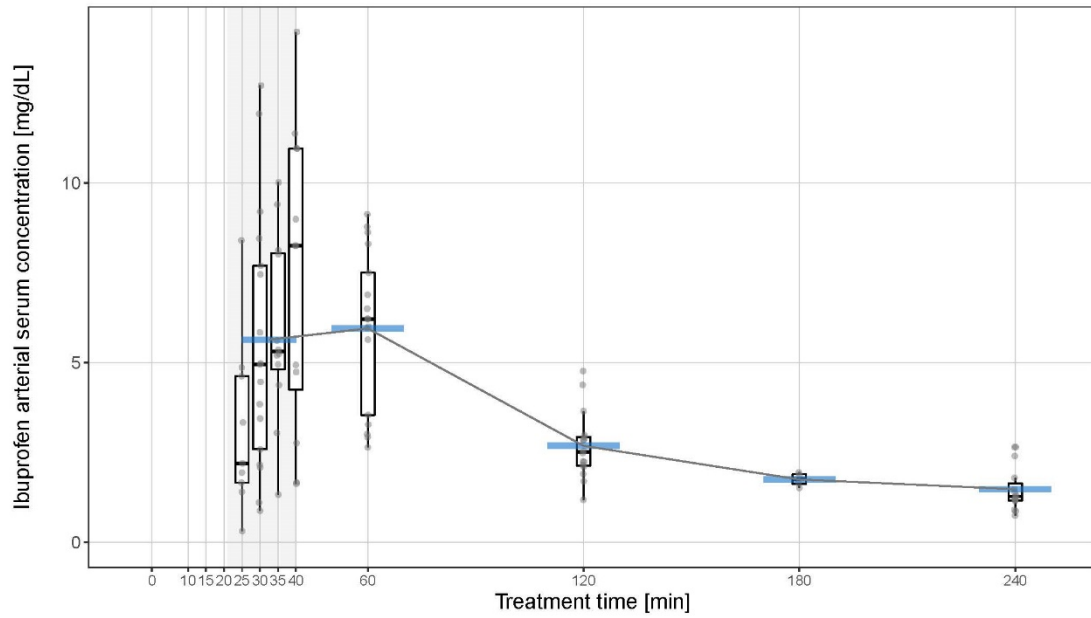

The shaded area between minute 21 and minute 40 indicates the ibuprofen infusion period. Blue bars represent the median over the corresponding period or time point.



Figure 7. Indoxyl sulfate venous serum concentration over time

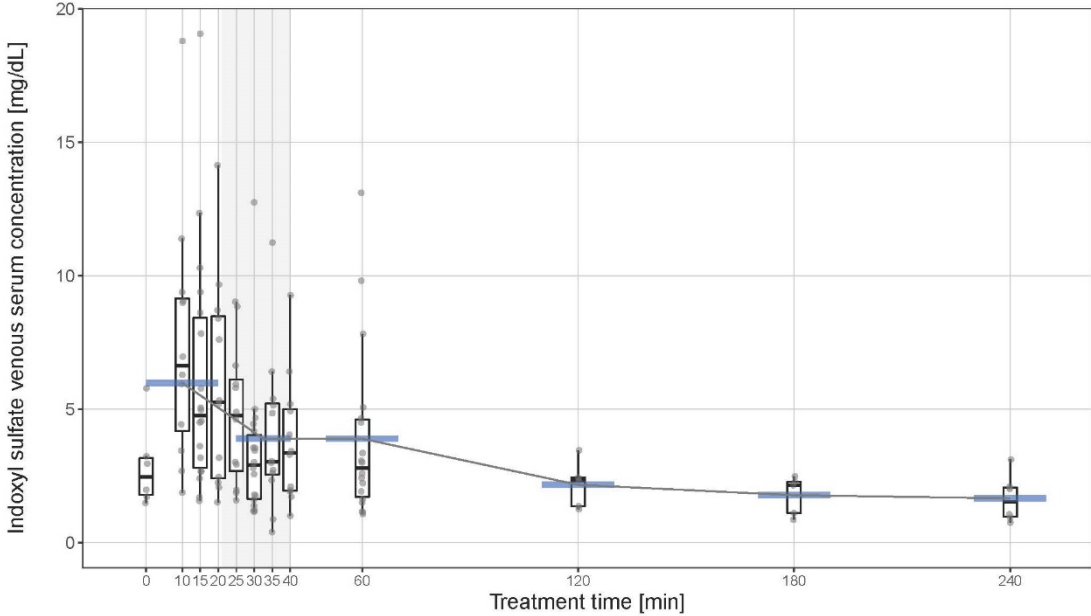

The shaded area between minute 21 and minute 40 indicates the ibuprofen infusion period. Blue bars represent the median over the corresponding period or time point.

Supplemental material is neither peer-reviewed nor thoroughly edited by CJASN. The authors alone are responsible for the accuracy and presentation of the material.

Figure 8. p-Cresyl sulfate venous serum concentration over time

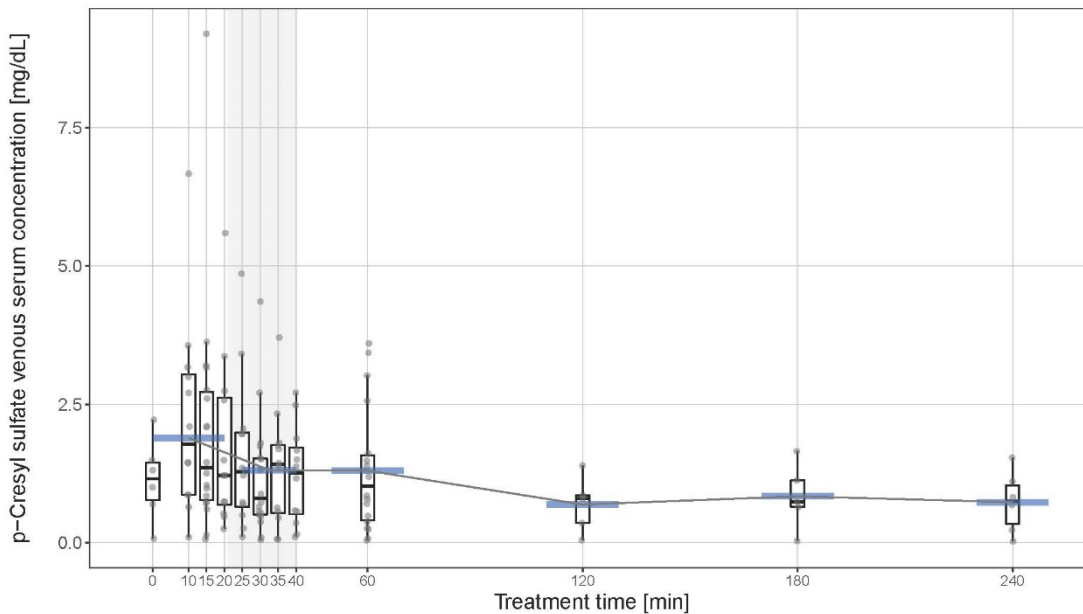

The shaded area between minute 21 and minute 40 indicates the ibuprofen infusion period. Blue bars represent the median over the corresponding period or time point.

Supplemental material is neither peer-reviewed nor thoroughly edited by CJASN. The authors alone are responsible for the accuracy and presentation of the material.

Figure 9. Tryptophan venous serum concentration over time

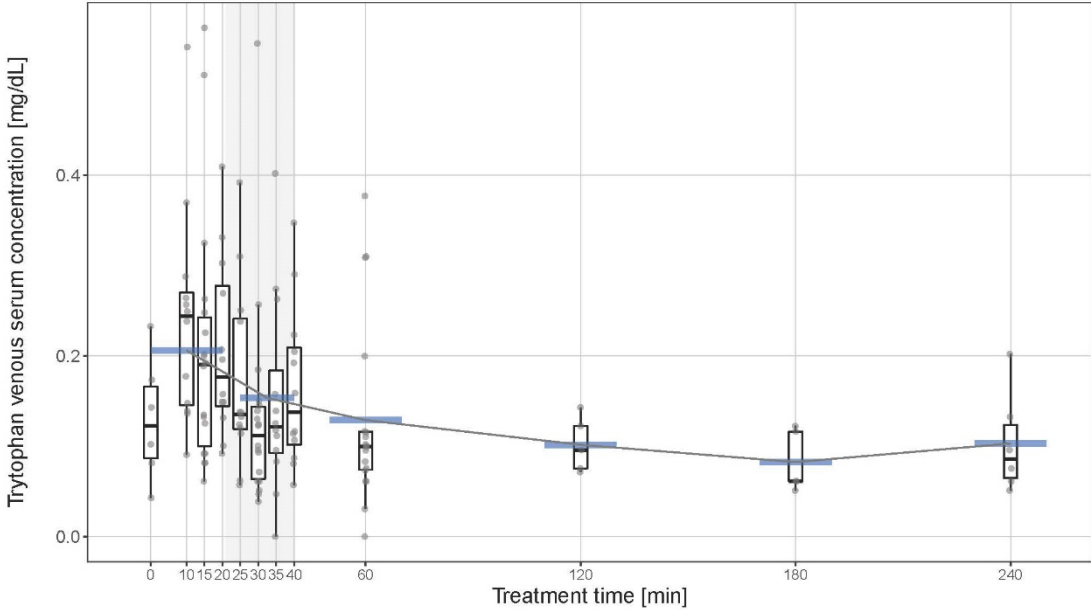

The shaded area between minute 21 and minute 40 indicates the ibuprofen infusion period. Blue bars represent the median over the corresponding period or time point.

Supplemental material is neither peer-reviewed nor thoroughly edited by CJASN. The authors alone are responsible for the accuracy and presentation of the material.

Figure 10. Urea venous serum concentration over time

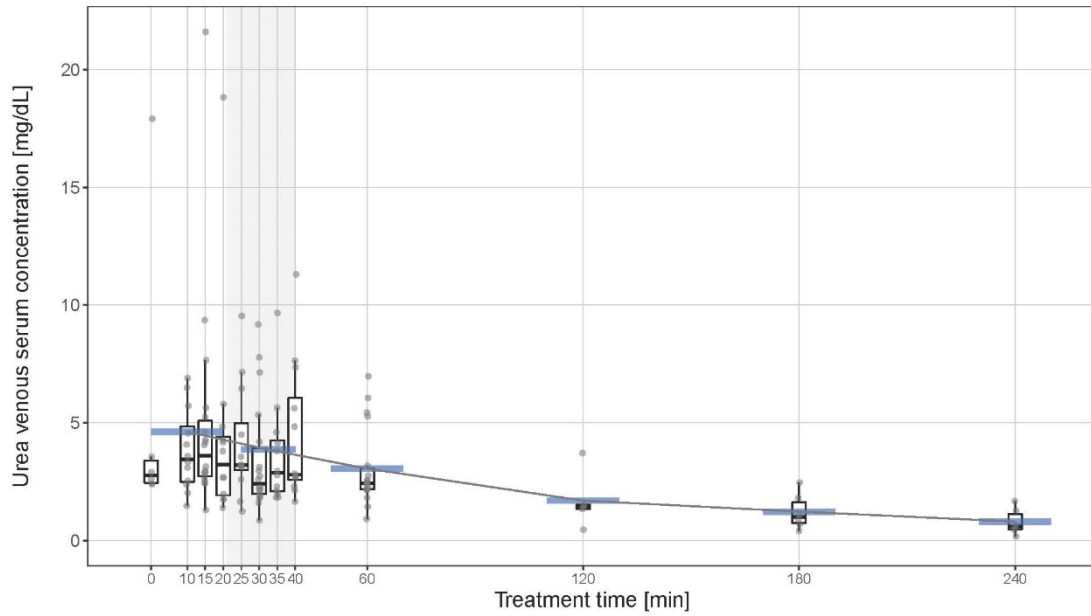

The shaded area between minute 21 and minute 40 indicates the ibuprofen infusion period. Blue bars represent the median over the corresponding period or time point.

Supplemental material is neither peer-reviewed nor thoroughly edited by CJASN. The authors alone are responsible for the accuracy and presentation of the material.

Figure 11. Creatinine venous serum concentration over time

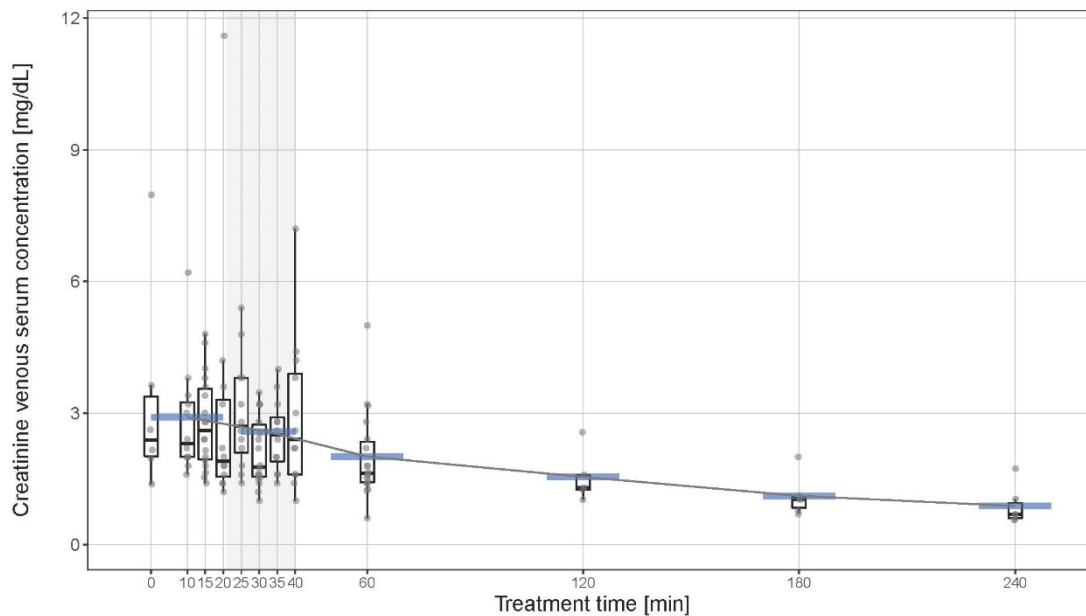

The shaded area between minute 21 and minute 40 indicates the ibuprofen infusion period. Blue bars represent the median over the corresponding period or time point.

Supplemental material is neither peer-reviewed nor thoroughly edited by CJASN. The authors alone are responsible for the accuracy and presentation of the material.

Figure 12. Ibuprofen venous serum concentration over time

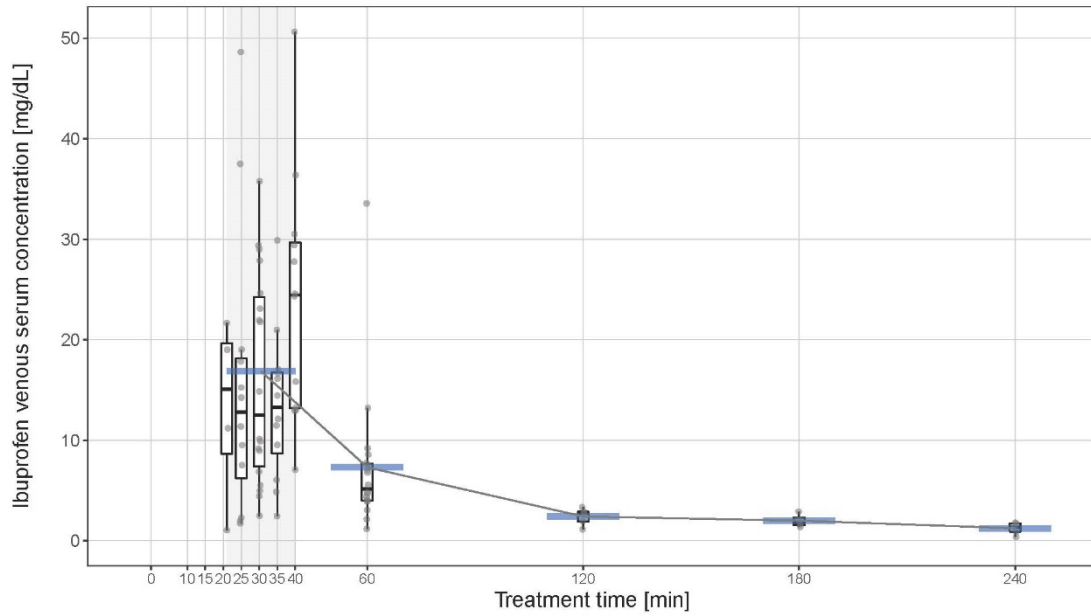

The shaded area between minute 21 and minute 40 indicates the ibuprofen infusion period. Blue bars represent the median over the corresponding period or time point.

Supplemental material is neither peer-reviewed nor thoroughly edited by CJASN. The authors alone are responsible for the accuracy and presentation of the material.

Figure 13. Indoxyl sulfate dialysate outlet concentration over time

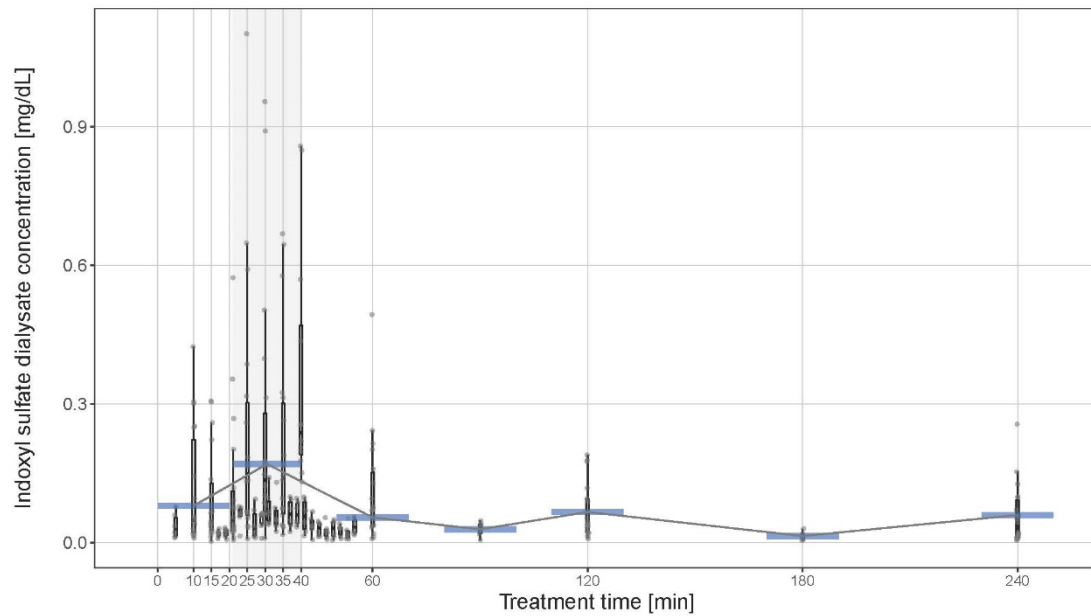

The shaded area between minute 21 and minute 40 indicates the ibuprofen infusion period. Blue bars represent the median over the corresponding period or time point.

Supplemental material is neither peer-reviewed nor thoroughly edited by CJASN. The authors alone are responsible for the accuracy and presentation of the material.

Figure 14. p-Cresyl sulfate dialysate outlet concentration over time

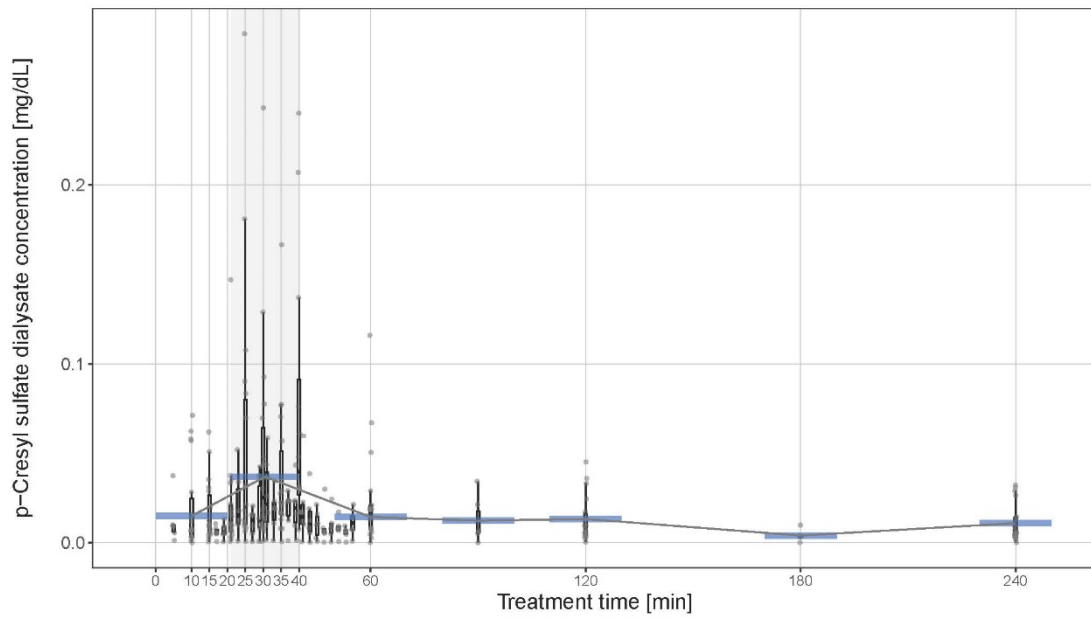

The shaded area between minute 21 and minute 40 indicates the ibuprofen infusion period. Blue bars represent the median over the corresponding period or time point.



Supplemental material is neither peer-reviewed nor thoroughly edited by CJASN. The authors alone are responsible for the accuracy and presentation of the material.

Figure 15. Tryptophan dialysate outlet concentration over time

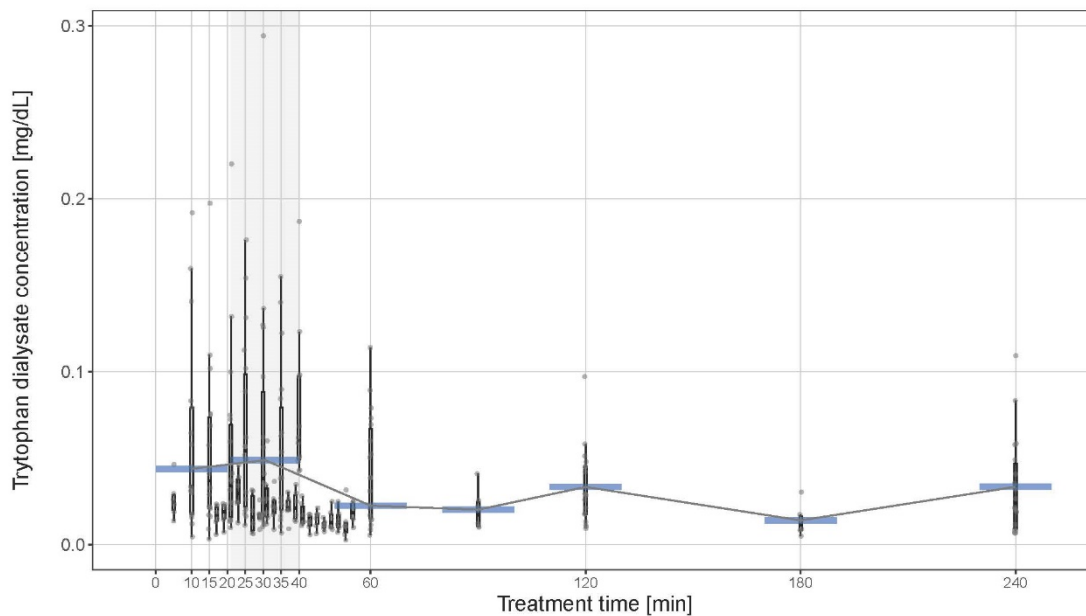

The shaded area between minute 21 and minute 40 indicates the ibuprofen infusion period. Blue bars represent the median over the corresponding period or time point.

Supplemental material is neither peer-reviewed nor thoroughly edited by CJASN. The authors alone are responsible for the accuracy and presentation of the material.

Figure 16. Urea dialysate outlet concentration over time

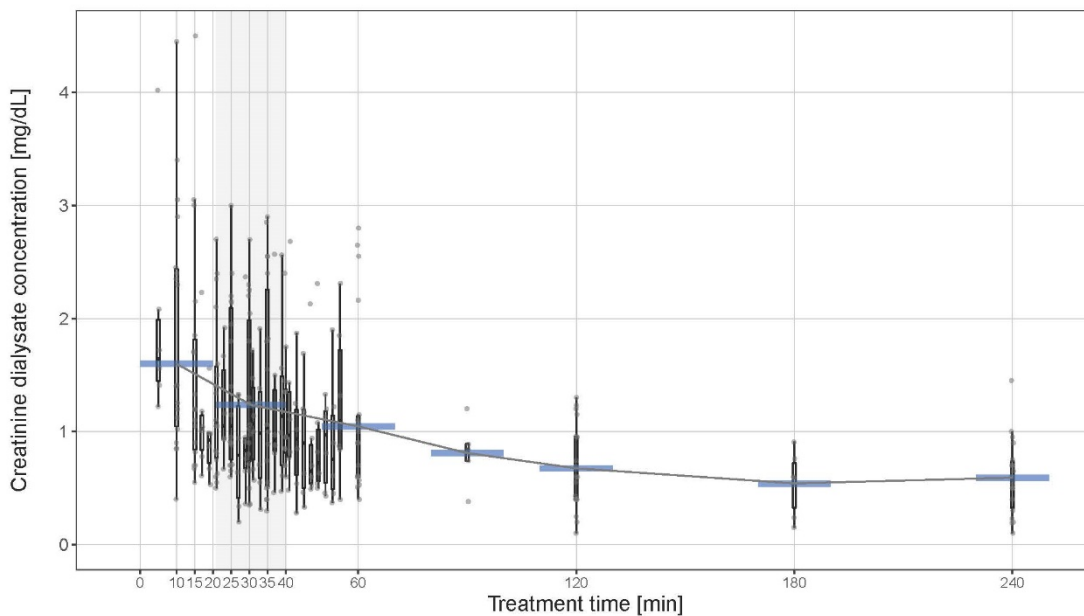

The shaded area between minute 21 and minute 40 indicates the ibuprofen infusion period. Blue bars represent the median over the corresponding period or time point.

Supplemental material is neither peer-reviewed nor thoroughly edited by CJASN. The authors alone are responsible for the accuracy and presentation of the material.

Figure 17. Creatinine dialysate outlet concentration over time

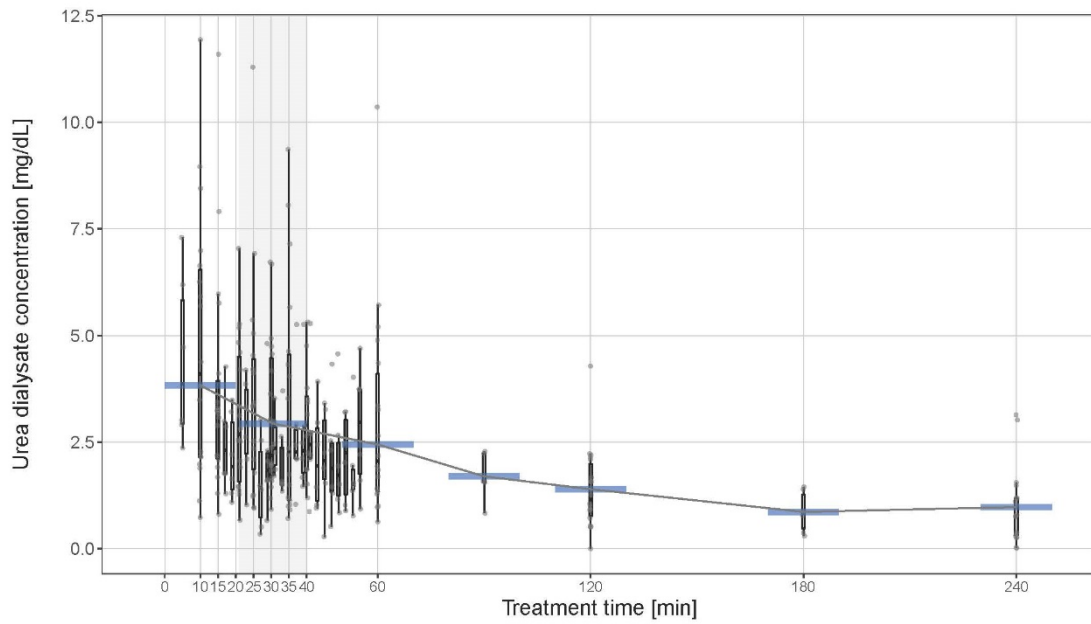

The shaded area between minute 21 and minute 40 indicates the ibuprofen infusion period. Blue bars represent the median over the corresponding period or time point.

Supplemental material is neither peer-reviewed nor thoroughly edited by CJASN. The authors alone are responsible for the accuracy and presentation of the material.

Figure 18. Ibuprofen dialysate outlet concentration over time

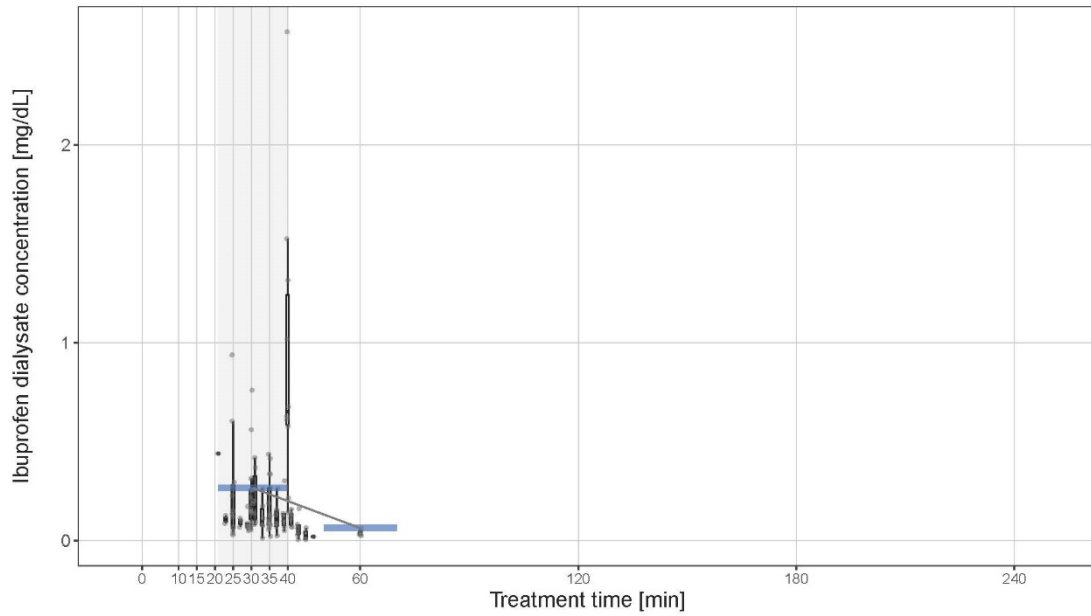

The shaded area between minute 21 and minute 40 indicates the ibuprofen infusion period. Blue bars represent the median over the corresponding period or time point.
